# Supplementary material for: Retained duplicate genes in green alga Chlamydomonas reinhardtii tend to be stress responsive and experience frequent response gains
Source: PubMed Central journal article supplement (PMC4364661; doi:10.1186/s12864-015-1335-5), 2015-03-04
Supplement: 12864_2015_1335_MOESM5_ESM.pdf [file 12864_2015_1335_MOESM5_ESM.pdf]

## Supplemental Figure 4

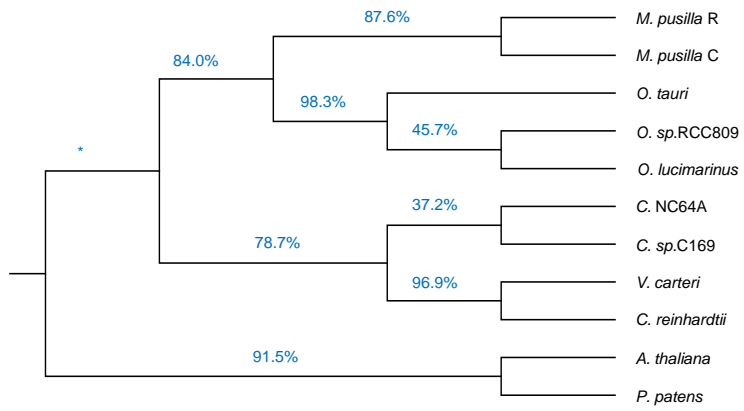

\*: not enough families to estimate percentage
